# Supplementary material for: Investigating the Antiviral Properties of Nyctanthes arbor-tristis Linn against the Ebola, SARS-CoV-2, Nipah, and Chikungunya Viruses: A Computational Simulation Study
Source: MDPI journal article supplement (doi:10.3390/ph17050581), 2024-04-30
Supplement: s1 [file s1]

**Table S1: Molecular interaction analysis details between screened natural compounds and Crystal structure of SARS-CoV2 main protease (PDB:6LU7)). In the column hydrogen bond details where UNK1=selected natural compounds**

| S.No. | Compound Name        | Binding energy | Hydrogen bond name          | Hydrogen bond Length | Inhibition constant | Residues involved in hydrophobic interaction                                                                                  |
|-------|----------------------|----------------|-----------------------------|----------------------|---------------------|-------------------------------------------------------------------------------------------------------------------------------|
| 1.    | alpha-Pinene         | -5.33          | Not formed                  | Not formed           | 122.91 uM           | His41<br>Met49<br>Tyr54<br>His164<br>Met165<br>Asp187<br>Arg188<br>Gln189                                                     |
| 2.    | Alpha-xylopyranoside | -5.95          | A:SER144:HG -<br>:UNK1:O21  | 3.00218              | 43.78 uM            | Thr25<br><br>Thr26<br>Leu27<br>His41<br>Met49<br>Phe140<br>Leu141<br>Asn142<br>Gly143<br>Ser144<br>Cys145<br>His163<br>His164 |
|       |                      |                | A:CYS145:HN -<br>:UNK1:O17  | 2.97309              |                     |                                                                                                                               |
|       |                      |                | A:CYS145:SG -<br>:UNK1:O6   | 3.23842              |                     |                                                                                                                               |
|       |                      |                | A:HIS163:HE2 -<br>:UNK1:O21 | 1.96749              |                     |                                                                                                                               |
|       |                      |                | :UNK1:H40 -<br>A:ASN142:OD1 | 2.08201              |                     |                                                                                                                               |
|       |                      |                | :UNK1:H41 -<br>A:LEU141:O   | 2.95556              |                     |                                                                                                                               |
|       |                      |                | :UNK1:H35 -<br>A:THR26:O    | 2.39324              |                     |                                                                                                                               |
|       |                      |                | :UNK1:H37 -<br>A:THR26:O    | 2.5729               |                     |                                                                                                                               |

|    |             |       |                             |         |         |                                                                                                                                                 |
|----|-------------|-------|-----------------------------|---------|---------|-------------------------------------------------------------------------------------------------------------------------------------------------|
|    |             |       | :UNK1:H36 -<br>A:THR26:O    | 2.24898 |         |                                                                                                                                                 |
|    |             |       | :UNK1:C1 -<br>A:LEU141:O    | 2.72466 |         |                                                                                                                                                 |
|    |             |       | :UNK1:C1 -<br>A:SER144:OG   | 3.02486 |         |                                                                                                                                                 |
| 3. | Apigenin    | -7.29 | A:GLY143:HN -<br>:UNK1:O18  | 2.08523 | 4.54 uM | His41<br>Met49<br>Tyr54<br>Leu141<br>Asn142<br>Gly143<br>Ser144<br>Cys145<br>His163<br>His164<br>Met165<br>Glu166<br>Asp187<br>Arg188<br>Gln189 |
|    |             |       | A:GLU166:HN -<br>:UNK1:O10  | 1.96446 |         |                                                                                                                                                 |
|    |             |       | :UNK1:H30 -<br>A:ASP187:O   | 1.82659 |         |                                                                                                                                                 |
|    |             |       | :UNK1:H28 -<br>A:LEU141:O   | 1.98939 |         |                                                                                                                                                 |
|    |             |       | A:CYS145:SG - :UNK1         | 4.06905 |         |                                                                                                                                                 |
| 4. | Arborside-B | -7.96 | A:SER144:HN -<br>:UNK1:O29  | 2.08674 | 1.47 uM | His41<br>Leu141<br>Asn142<br>Gly143<br>Ser144<br>Cys145<br>His163<br>His164<br>Met165<br>Glu166                                                 |
|    |             |       | A:CYS145:HN -<br>:UNK1:O29  | 2.56942 |         |                                                                                                                                                 |
|    |             |       | :UNK1:H59 -<br>A:ASN142:OD1 | 2.82963 |         |                                                                                                                                                 |
|    |             |       | :UNK1:H60 -<br>A:ASN142:OD1 | 1.88472 |         |                                                                                                                                                 |
|    |             |       | A:GLY143:HN - :UNK1         | 2.91948 |         |                                                                                                                                                 |

|    |                   |       |                          |         |           |        |
|----|-------------------|-------|--------------------------|---------|-----------|--------|
|    |                   |       | A:CYS145:SG - :UNK1      | 4.09983 |           | Gln189 |
| 5. | Arborside-C       | -8.65 | A:THR26:HN - :UNK1:O30   | 2.24178 | 456.39 nM | Thr25  |
|    |                   |       | A:GLY143:HN - :UNK1:O19  | 1.98872 |           | Thr26  |
|    |                   |       | A:HIS163:HE2 - :UNK1:O35 | 2.16799 |           | Leu27  |
|    |                   |       | A:GLN189:HE21 - :UNK1:O9 | 2.99984 |           | His41  |
|    |                   |       | :UNK1:H61 - A:THR26:O    | 2.0638  |           | Met49  |
|    |                   |       | :UNK1:C18 - A:LEU141:O   | 3.40553 |           | Phe140 |
|    |                   |       | :UNK1:C28 - A:THR26:O    | 2.86457 |           | Leu141 |
|    |                   |       | :UNK1:C36 - A:PHE140:O   | 3.14551 |           | Asn142 |
|    |                   |       | :UNK1:C36 - A:GLU166:OE2 | 3.47377 |           | Gly143 |
| 6. | Arbortristoside-B | -7.68 | A:GLY143:HN - :UNK1:O40  | 2.79446 | 2.35 uM   | Ser144 |
|    |                   |       | A:CYS145:HN - :UNK1:O40  | 2.29093 |           |        |
|    |                   |       | A:CYS145:HN - :UNK1:O41  | 2.97845 |           |        |
|    |                   |       | A:HIS163:HE2 - :UNK1:O4  | 2.37026 |           |        |
|    |                   |       | :UNK1:H71 - A:THR26:O    | 2.08247 |           |        |

|    |                   |       |                             |         |         |                                                                                                                                                |
|----|-------------------|-------|-----------------------------|---------|---------|------------------------------------------------------------------------------------------------------------------------------------------------|
|    |                   |       | :UNK1:H73 -<br>A:CYS145:SG  | 2.3045  |         | Cys145<br>His163<br>His164<br>Met165<br>Glu166<br>Pro168<br>His172<br>Arg188<br>Gln189<br>Thr190<br>Ala191<br>Gln192                           |
|    |                   |       | :UNK1:H54 -<br>A:GLN189:OE1 | 2.09123 |         |                                                                                                                                                |
|    |                   |       | :UNK1:H55 -<br>A:ASN142:OD1 | 1.96576 |         |                                                                                                                                                |
|    |                   |       | :UNK1:H61 -<br>A:THR190:O   | 2.0507  |         |                                                                                                                                                |
| 7. | Arbortristoside-C | -7.50 | A:HIS41:HE2 -<br>:UNK1:O9   | 2.01607 | 3.19 uM | Thr24<br>Thr25<br>Thr26<br>His41<br>Asn142<br>Gly143<br>Cys145<br>His163<br>His164<br>Met165<br>Glu166<br>Arg188<br>Gln189<br>Thr190<br>Gln192 |
|    |                   |       | A:CYS145:SG -<br>:UNK1:O9   | 2.76755 |         |                                                                                                                                                |
|    |                   |       | A:GLU166:HN -<br>:UNK1:O22  | 2.0587  |         |                                                                                                                                                |
|    |                   |       | :UNK1:H65 -<br>A:GLN189:OE1 | 2.06957 |         |                                                                                                                                                |
|    |                   |       | :UNK1:H66 -<br>A:ASN142:OD1 | 2.13344 |         |                                                                                                                                                |
|    |                   |       | :UNK1:H54 -<br>A:THR24:O    | 2.14432 |         |                                                                                                                                                |
|    |                   |       | :UNK1:H55 -<br>A:HIS164:O   | 1.80929 |         |                                                                                                                                                |
|    |                   |       | :UNK1:C39 -<br>A:ARG188:O   | 2.88695 |         |                                                                                                                                                |
|    |                   |       | A:THR26:HN - :UNK1          | 2.86371 |         |                                                                                                                                                |

|    |                   |       |                             |         |          |                                                                                                                                                                    |
|----|-------------------|-------|-----------------------------|---------|----------|--------------------------------------------------------------------------------------------------------------------------------------------------------------------|
| 8. | arbortristosome-D | -5.86 | A:HIS163:HE2 -<br>:UNK1:O38 | 2.08926 | 50.37 uM | Thr25<br>Thr26<br>Leu27<br>Met49<br>Phe140<br>Leu141<br>Asn142<br>Gly143<br>Ser144<br>Cys145<br>His163<br>Met165<br>Glu166<br>Leu167<br>Pro168<br>His172<br>Gln189 |
|    |                   |       | A:HIS163:HE2 -<br>:UNK1:O39 | 2.21217 |          |                                                                                                                                                                    |
|    |                   |       | :UNK1:H71 -<br>A:LEU141:O   | 2.36987 |          |                                                                                                                                                                    |
|    |                   |       | :UNK1:H71 -<br>A:SER144:OG  | 2.0504  |          |                                                                                                                                                                    |
|    |                   |       | :UNK1:H72 -<br>A:CYS145:SG  | 2.51634 |          |                                                                                                                                                                    |
|    |                   |       | :UNK1:H59 -<br>A:THR26:O    | 2.00564 |          |                                                                                                                                                                    |
|    |                   |       | :UNK1:H60 -<br>A:THR26:O    | 1.76109 |          |                                                                                                                                                                    |
|    |                   |       | :UNK1:C6 -<br>A:GLU166:O    | 3.14568 |          |                                                                                                                                                                    |
|    |                   |       | :UNK1:C31 -<br>A:ASN142:OD1 | 3.1776  |          |                                                                                                                                                                    |
|    |                   |       | :UNK1:C37 -<br>A:PHE140:O   | 3.09174 |          |                                                                                                                                                                    |
|    |                   |       | :UNK1:C37 -<br>A:GLU166:OE2 | 2.98373 |          |                                                                                                                                                                    |
| 9. | benzoic_acid      | -3.73 | A:TYR54:HH -<br>:UNK1:O8    | 2.2045  | 1.85 mM  | His41<br>Cys44<br>Met49<br>Leu50<br>Pro52<br>Tyr54<br>His164<br>Met165<br>Asp187                                                                                   |
|    |                   |       | :UNK1:H15 -<br>A:MET49:O    | 1.94985 |          |                                                                                                                                                                    |

|     |                 |                   |                          |            |           |                                                                                                                                                         |
|-----|-----------------|-------------------|--------------------------|------------|-----------|---------------------------------------------------------------------------------------------------------------------------------------------------------|
|     |                 |                   |                          |            |           | Arg188<br>Gln189                                                                                                                                        |
| 10. | beta-Sitosterol | -9.11<br>kcal/mol | :UNK1:H67 -<br>A:THR26:O | 1.88315    | 210.29 nM | Thr26<br>His41<br>Met49<br>Gly143<br>Ser144<br>Cys145<br>His164<br>Met165<br>Glu166<br>Arg188<br>Gln189<br>Thr190<br>Gln192                             |
| 11. | hentriacontane  | -4.41             | Not formed               | Not formed | 589.57 uM | Thr24<br>Thr25<br>Thr26<br>Leu27<br>His41<br>Asn119<br>Phe140<br>Leu141<br>Asn142<br>Gly143<br>Ser144<br>Cys145<br>His163<br>His164<br>Met165<br>Glu166 |

|     |           |       |                             |         |           |                                                                                                                                                  |
|-----|-----------|-------|-----------------------------|---------|-----------|--------------------------------------------------------------------------------------------------------------------------------------------------|
| 12. | Kaemferol | -7.01 | A:HIS163:HE2 -<br>:UNK1:O18 | 1.88967 | 7.32 uM   | His41<br>Met49<br>Phe140<br>Leu141<br>Gly143<br>Ser144<br>Cys145<br>His163<br>His164<br>Met165<br>Glu166<br>Arg188<br>Gln189<br>Thr190<br>Gln192 |
|     |           |       | A:GLU166:HN -<br>:UNK1:O17  | 2.19162 |           |                                                                                                                                                  |
|     |           |       | :UNK1:H31 -<br>A:ARG188:O   | 1.93641 |           |                                                                                                                                                  |
|     |           |       | :UNK1:H30 -<br>A:GLN189:OE1 | 1.83423 |           |                                                                                                                                                  |
|     |           |       | :UNK1:H28 -<br>A:LEU141:O   | 2.46306 |           |                                                                                                                                                  |
|     |           |       | A:CYS145:SG - :UNK1         | 4.00364 |           |                                                                                                                                                  |
| 13. | lupeol    | -5.97 | A:THR26:HN -<br>:UNK1:O29   | 2.6656  | 42.41 uM  | Thr24<br>Thr25<br>Thr26<br>Met49<br>Leu141<br>Asn142<br>Gly143<br>Ser144<br>Cys145<br>His163<br>His164<br>Met165<br>Glu166                       |
|     |           |       | :UNK1:H75 -<br>A:THR24:O    | 2.11616 |           |                                                                                                                                                  |
|     |           |       | A:THR25:CA -<br>:UNK1:O29   | 2.78459 |           |                                                                                                                                                  |
| 14. | Mannitol  | -4.13 | A:GLY143:HN -<br>:UNK1:O12  | 2.29082 | 946.30 uM | Leu141<br>Asn142                                                                                                                                 |

|     |                   |       |                             |         |           |                                                                                                         |
|-----|-------------------|-------|-----------------------------|---------|-----------|---------------------------------------------------------------------------------------------------------|
|     |                   |       | A:CYS145:HN -<br>:UNK1:O12  | 2.79644 |           | Gly143<br>Ser144<br>Cys145<br>His163<br>Glu166<br>Gln189                                                |
|     |                   |       | :UNK1:H26 -<br>A:LEU141:O   | 1.88062 |           |                                                                                                         |
|     |                   |       | :UNK1:H26 -<br>A:SER144:OG  | 2.95403 |           |                                                                                                         |
|     |                   |       | :UNK1:H25 -<br>A:LEU141:O   | 2.03886 |           |                                                                                                         |
|     |                   |       | :UNK1:H21 -<br>A:GLN189:OE1 | 2.10034 |           |                                                                                                         |
|     |                   |       | :UNK1:H22 -<br>A:GLN189:OE1 | 1.92968 |           |                                                                                                         |
|     |                   |       | :UNK1:H24 -<br>A:ASN142:OD1 | 2.18809 |           |                                                                                                         |
| 15. | methyl_salicylate | -4.28 | A:GLY143:HN -<br>:UNK1:O11  | 3.09594 | 733.45 uM | Thr26<br>Leu27<br>His41<br>Leu141<br>Asn142<br>Gly143<br>Ser144<br>Cys145<br>His163<br>Met165<br>Glu166 |
|     |                   |       | A:CYS145:HN -<br>:UNK1:O2   | 2.29403 |           |                                                                                                         |
|     |                   |       | A:CYS145:HN -<br>:UNK1:O11  | 2.45436 |           |                                                                                                         |
|     |                   |       | :UNK1:H19 -<br>A:LEU141:O   | 1.95009 |           |                                                                                                         |
|     |                   |       | :UNK1:H19 -<br>A:SER144:OG  | 1.85687 |           |                                                                                                         |
|     |                   |       | A:CYS145:SG - :UNK1         | 3.61396 |           |                                                                                                         |
| 16. | Nyctanthic_acid   | -7.09 | A:THR26:HN -<br>:UNK1:O15   | 1.84215 | 6.31 uM   | Thr24<br>Thr25<br>Thr26<br>His41<br>Met49                                                               |
|     |                   |       | :UNK1:H51 -<br>A:THR24:O    | 2.03147 |           |                                                                                                         |



|     |               |       |                                                                                                                                                                                                                                                                          |                                                                                               |           |                                                                                                                     |
|-----|---------------|-------|--------------------------------------------------------------------------------------------------------------------------------------------------------------------------------------------------------------------------------------------------------------------------|-----------------------------------------------------------------------------------------------|-----------|---------------------------------------------------------------------------------------------------------------------|
|     |               |       |                                                                                                                                                                                                                                                                          |                                                                                               |           | Phe140<br>Leu141<br>Asn142<br>Gly143<br>Ser144<br>Cys145<br>His163<br>His164<br>Met165<br>Glu166                    |
| 17. | Nyctanthoside | -5.65 | A:HIS163:HE2 -<br>:UNK1:O15<br>:UNK1:H52 -<br>A:HIS164:O<br>:UNK1:H54 -<br>A:GLU166:O<br>:UNK1:H55 -<br>A:GLU166:O<br>:UNK1:H42 -<br>A:LEU141:O<br>:UNK1:H43 -<br>A:PHE140:O<br>:UNK1:H43 -<br>A:GLU166:OE2<br>:UNK1:C23 -<br>A:GLN189:OE1<br>:UNK1:C1 -<br>A:GLU166:OE1 | 1.86791<br>1.97887<br>2.14452<br>2.22595<br>2.2175<br>2.6644<br>1.72767<br>3.28385<br>3.38305 | 72.48 uM  | His41<br>Phe140<br>Leu141<br>Asn142<br>Ser144<br>His163<br>His164<br>Met165<br>Glu166<br>His172<br>Arg188<br>Gln189 |
| 18. | p-cymene      | -4.72 | NA                                                                                                                                                                                                                                                                       | NA                                                                                            | 349.63 uM | His41<br>Cys44<br>Met49                                                                                             |

|     |           |       |                           |         |           |                                                                  |
|-----|-----------|-------|---------------------------|---------|-----------|------------------------------------------------------------------|
|     |           |       |                           |         |           | Pro52<br>Tyr54<br>His164<br>Met165<br>Asp187<br>Arg188<br>Gln189 |
| 19. | Quercetin | -8.43 | :UNK1:H32 -<br>A:THR190:O | 2.13572 | 664.97 nM | His41                                                            |
|     |           |       | :UNK1:H31 -<br>A:THR190:O | 2.32119 |           | Tyr54                                                            |
|     |           |       | :UNK1:H30 -<br>A:GLU166:O | 2.061   |           | Cys145                                                           |
|     |           |       | :UNK1:H29 -<br>A:HIS164:O | 3.02736 |           | His164                                                           |
|     |           |       | :UNK1:H28 -<br>A:ASP187:O | 2.49028 |           | Met165                                                           |
|     |           |       |                           |         |           | Glu166                                                           |
|     |           |       |                           |         |           | Leu167                                                           |
|     |           |       |                           |         |           | Pro168                                                           |
|     |           |       |                           |         |           | Asp187                                                           |
|     |           |       |                           |         |           | Arg188                                                           |
|     |           |       |                           |         |           | Gln189                                                           |
|     |           |       |                           |         |           | Thr190                                                           |
|     |           |       |                           |         |           | Ala191                                                           |
|     |           |       |                           |         |           | Gln192                                                           |

**Table S2. ADME prediction from SwissADME (GI=Gastro intestinal, BBB=Blood Brain Barrier, Pgp=P glycoprotein, CYP=Cytochrome, log K<sub>p</sub>= skin permeation)**

| Compounds       | GI absorption | BBB permeant | Pgp substrate | CYP1A2 inhibitor | CYP2C19 inhibitor | CYP2C9 inhibitor | CYP2D6 inhibitor | CYP3A4 inhibitor | log K <sub>p</sub> (cm/s)                                           |
|-----------------|---------------|--------------|---------------|------------------|-------------------|------------------|------------------|------------------|---------------------------------------------------------------------|
|                 |               |              |               |                  |                   |                  |                  |                  | negative the log K <sub>p</sub> the less skin permeant the molecule |
| Remdesivir      | Low           | No           | Yes           | No               | No                | No               | No               | Yes              | -8.62                                                               |
| Arborside-C     | Low           | No           | Yes           | No               | No                | No               | No               | No               | -9.51                                                               |
| Beta-Sitosterol | Low           | No           | No            | No               | No                | No               | No               | No               | -2.2                                                                |
| Beta-amyrin     | Low           | No           | No            | No               | No                | No               | No               | No               | -2.41                                                               |
| Nicotiflorin    | Low           | No           | Yes           | No               | No                | No               | No               | No               | -9.91                                                               |



**Table S3. Drug-likeness prediction from SwissADME server (MW=Molecular Weight, TPSA= total polar surface area, Consensus Log P= average of all predicted Log Po/w**

| Compounds       | MW (g/mol)                   | Rotatable bonds                | H-bond acceptors | H-bond donors | TPSA (Å²)                  | Consensus Log P   | Lipinski violations | Ghose violations | Veber violations | Egan violations | Muegge violations | Bioavailability Score | Synthetic Accessibility                                                 |
|-----------------|------------------------------|--------------------------------|------------------|---------------|----------------------------|-------------------|---------------------|------------------|------------------|-----------------|-------------------|-----------------------|-------------------------------------------------------------------------|
|                 | MW between 150 and 500 g/mol | no more than 9 rotatable bonds |                  |               | TPSA between 20 and 130 Å² | not higher than 6 |                     |                  |                  |                 |                   | not less than 0.25    | normalized between 1 (easy synthesis) and 10 (very difficult synthesis) |
| Remdesivir      | 602.58                       | 14                             | 12               | 4             | 213.36                     | 1.54              | 2                   | 3                | 2                | 1               | 3                 | 0.17                  | 6.43                                                                    |
| Arborside-C     | 510.49                       | 8                              | 12               | 5             | 181.44                     | -0.31             | 2                   | 2                | 1                | 1               | 2                 | 0.11                  | 6.14                                                                    |
| Beta-Sitosterol | 414.71                       | 6                              | 1                | 1             | 20.23                      | 7.19              | 1                   | 3                | 0                | 1               | 2                 | 0.55                  | 6.3                                                                     |
| Beta-amyrin     | 426.72                       | 0                              | 1                | 1             | 20.23                      | 7.18              | 1                   | 3                | 0                | 1               | 2                 | 0.55                  | 6.04                                                                    |
| Nicotiflorin    | 594.52                       | 6                              | 15               | 9             | 249.20                     | -0.73             | 3                   | 4                | 1                | 1               | 3                 | 0.17                  | 6.48                                                                    |

**Table S4: toxicity prediction. Data obtained from pkCSM server**

|                  | AMES toxicity      | Max. tolerated dose (Human)    | hERG I inhibitor | hERG II inhibitor | Oral Rat Acute Toxicity (LD50) | Oral Rat Chronic Toxicity (LOAEL) | Hepatotoxicity | Skin sensitisation | T. pyriformis toxicity | Minnow toxicity      |
|------------------|--------------------|--------------------------------|------------------|-------------------|--------------------------------|-----------------------------------|----------------|--------------------|------------------------|----------------------|
| Standard cut-off | Positive mutagenic | $\leq 0.477$<br>log(mg/kg/day) |                  |                   |                                | lowest                            |                |                    | $> -0.5$ log<br>ug/L   | Log<br>LC50 $< -0.3$ |
| Compounds        |                    |                                |                  |                   |                                |                                   |                |                    |                        |                      |
| Remdesivir       | No                 | 0.323                          | No               | Yes               | 2.329                          | 2.477                             | No             | No                 | 0.285                  | 1.57                 |
| Arborside-C      | No                 | -0.397                         | No               | Yes               | 2.701                          | 4.723                             | No             | No                 | 0.285                  | 3.731                |
| Beta-Sitosterol  | Yes                | 0.559                          | No               | No                | 2.482                          | -0.515                            | No             | No                 | 0.285                  | 4.614                |
| Beta-amyrin      | No                 | -0.312                         | No               | Yes               | 2.296                          | 0.922                             | No             | No                 | 0.388                  | -1.747               |
| Nicotiflorin     | No                 | 0.221                          | No               | Yes               | 2.518                          | 5.488                             | No             | No                 | 0.285                  | 7.767                |
